# Supplementary material for: Perfluoroalkyl compounds (PFCs) in wildlife from an urban estuary
Source: Royal Society of Chemistry journal article supplement (doi:10.1039/c1em10609k), 2011-12-03
Supplement: c1em10609k.pdf [file c1em10609k.pdf]

## **Supplemental Information**

Perfluoroalkyl Compounds in Wildlife from an Urban Estuary

Margaret Sedlak and Denise Greig

### **Quality Assurance and Quality Control (QA/QC)**

Data QA/QC samples included laboratory blanks, laboratory spikes, sample duplicates, matrix spikes and matrix duplicates, and continuing calibration samples, all of which were analyzed in a manner similar to the samples. Initial calibration included a six point calibration curve; continuing calibration verification was conducted every 20 samples. In any given batch, 5% of the samples were procedural blanks, 5% were laboratory duplicates; and 5% were spiked reference materials. The sequence for the analysis was as follows: 1-2 instrument blanks; 6 point initial calibration; 1-2 instrument blanks; spiked reference sample; instrument blank; procedural blank, samples; calibration verifications; followed by samples.

For the seal serum, human and/or bovine serum was used as the sample matrix for blanks, spikes, and calibration standards. For egg and small fish samples, fish tissue was used for the calibration standard matrix.

For seals, four laboratory duplicates were analyzed for seals. Relative percent differences (RPDs) for the duplicates for all analytes were less than 25% with the exception of one batch of samples for which the PFOA RPD was 49%. Laboratory spike reference samples and blanks were run with each batch of samples processed. Laboratory spike samples yielded results within 10% of the expected values for most samples. PFCs were not detected in any laboratory or field blanks (empty vials that accompanied

sampling vials into the field). Due to the limited sample size allowed by the permits, it was not possible to prepare a matrix spike.

For cormorants, laboratory blank and spike was analyzed for each year (nine composites for each year). A replicate composite sample was collected for 2006; a matrix spike (MS) and duplicate (MSD) for 2009. PFCs were not detected above the MDL in any blank. RPDs for compounds detected varied between 1.7 and 19% with an average of 9.9%. Laboratory spike values ranged from 91 to 119%, with an average recovery of 103%. MS recoveries varied between 92 to 115% (average 103%) with an average RPD of 5.4% (range 1.0 to 13.7%).

For small fish, laboratory blank, spike, MS and MSD and laboratory replicate were analyzed. PFCs were not detected in the blank. With the exception of PFHxS, spikes and matrix spikes varied in recoveries from 76.4 to 130%. Spike recoveries for PFHxS (138) were slightly above the QA/QC limits. PFHxS was only detected in one sample slightly above the MDL and was not reported. The RPD between the MS and MSD varied between 0 and 26.4 %. PFC was not detected in the laboratory replicate samples.

## Results

Table 1 Small Fish – Individual Results

| StationCode   | StationName                         | Species                | Perfluorodecanoate | Perfluorooctanesulfonamide | Perfluorooctanesulfonate |
|---------------|-------------------------------------|------------------------|--------------------|----------------------------|--------------------------|
|               |                                     |                        | ng/g               | ng/g                       | ng/g                     |
| SF09-23-71OTH | Honker Bay, Back Inlet (Open water) | Mississippi Silverside | ND                 | ND                         | 9.08                     |
| SF09-19-70OTH | SouthWest San Pablo Bay             | Topsmelt               | ND                 | ND                         | ND                       |
| SF09-11-FSSDW | Fairfield-Suisun/ Boynton Sl        | Mississippi Silverside | ND                 | ND                         | 80                       |
| SF09-13-SVCSD | Sonoma Valley Schell Ck             | Mississippi Silverside | ND                 | ND                         | 8.76                     |
| SF09-23-71OTH | Honker Bay, Back Inlet (Open water) | Topsmelt               | ND                 | ND                         | 5.7                      |
| SF09-22-72OTH | Alameda Bayshore, Crab Cove         | Mississippi Silverside | ND                 | ND                         | 12.4                     |
| SF09-07-OAKIH | Oakland Inner Harbor                | Topsmelt               | ND                 | ND                         | ND                       |
| SF09-22-72OTH | Alameda Bayshore, Crab Cove         | Topsmelt               | ND                 | ND                         | 13.6                     |
| SF09-07-OMHEA | Oakland Middle Harbor               | Topsmelt               | ND                 | ND                         | ND                       |
| SF09-24-74OTH | Richmond Bridge SE Shore            | Topsmelt               | ND                 | ND                         | ND                       |
| SF09-14-NEWSL | Newark Slough                       | Topsmelt               | ND                 | ND                         | 41.7                     |
| SF09-15-ALVSL | Alviso Slough                       | Mississippi Silverside | ND                 | 4.31                       | 60.2                     |
| SF09-15-PALOA | Palo Alto                           | Mississippi Silverside | 3.4                | 9.58                       | 28.2                     |
| SF09-25-TOMAL | Tomaes Bay, Walker Creek Base       | Topsmelt               | ND                 | ND                         | ND                       |

Table 2 Seal – Individual Results

| SITE_NAME | SampleDate | Age      | Sex    | PFDA  | PFDoA | PFHpA  | PFHxS | PFNA  | PFOS  | PFOA   | PFUnA |
|-----------|------------|----------|--------|-------|-------|--------|-------|-------|-------|--------|-------|
|           |            |          |        | ng/mL | ng/mL | ng/mL  | ng/mL | ng/mL | ng/mL | ng/mL  | ng/mL |
| Mowry     | 6/2/04     | Adult    | Female | 14.9  | 9.04  | 0.25   | 50.6  | 12.9  | 921   | 3.91   | 8.16  |
| Mowry     | 6/2/04     | Adult    | Male   | 23.1  | 8.59  | 0.25   | 33.9  | 20.1  | 875   | 5.95   | 17.8  |
| Mowry     | 6/2/04     | Adult    | Female | 5.93  | 2.34  | 0.25   | 24.4  | 6.35  | 401   | 8.93   | 3.25  |
| Mowry     | 6/2/04     | Weaner   | Female | 11.4  | 4.92  | 1.34   | 154   | 43.3  | 1960  | 10.3   | 8.13  |
| Mowry     | 6/2/04     | Weaner   | Male   | 6.23  | 3.72  | 0.745  | 36.6  | 6.83  | 566   | 6.6    | 4.89  |
| Mowry     | 6/2/04     | Adult    | Female | 16.7  | 11.5  | 0.635  | 88.6  | 18.5  | 1540  | 11.3   | 10.4  |
| Tomales   | 6/18/07    | Subadult | Male   | 1.53  | 0.672 | 0.25   | 0.25  | 2.18  | 15.1  | 0.25   | 4.31  |
| Tomales   | 6/18/07    | Yearling | Female | 1.44  | 0.684 | 0.25   | 10.8  | 1.52  | 28.7  | 0.25   | 5     |
| Tomales   | 6/18/07    | Adult    | Female | 1.13  | 0.25  | 0.25   | 0.25  | 1.15  | 19.2  | 0.25   | 2.62  |
| Tomales   | 6/18/07    | Yearling | Male   | 1.79  | 0.62  | 0.25   | 1.51  | 1.44  | 18.7  | 0.25   | 5.2   |
| Tomales   | 6/18/07    | Adult    | Male   | 1.4   | 0.607 | 0.25   | 3.38  | 2.49  | 22.4  | 0.25   | 6.34  |
| Tomales   | 6/20/07    | Subadult | Female | 1.31  | 0.525 | 0.25   | 0.25  | 1.18  | 21.7  | 0.25   | 3.44  |
| Tomales   | 6/20/07    | Weaner   | Female | 2.25  | 0.554 | 0.25   | 5.92  | 4.03  | 80.5  | 1.07   | 2.07  |
| Tomales   | 6/3/08     | Weaner   | Male   | 1.67  | 1.08  | 0.329  | 0.25  | 2.51  | 22.6  | 0.329  | 5.78  |
| Tomales   | 6/4/08     | Weaner   | Male   | 3.82  | 1.29  | 0.3155 | 2.57  | 4.02  | 43.8  | 0.3155 | 9.69  |
| Tomales   | 6/4/08     | Weaner   | Female | 2.27  | 0.775 | 0.254  | 2.41  | 3.81  | 31.9  | 0.254  | 6.34  |
| Tomales   | 6/4/08     | Weaner   | Female | 0.571 | 0.517 | 0.2495 | 1.04  | 1.39  | 18.6  | 0.2495 | 2.16  |

| SITE_NAME | SampleDate | Age      | Sex    | PFDA | PFDoA | PFHpA  | PFHxS | PFNA  | PFOS | PFOA   | PFUnA |
|-----------|------------|----------|--------|------|-------|--------|-------|-------|------|--------|-------|
| Tomales   | 6/4/08     | Weaner   | Male   | 1.14 | 0.938 | 0.2735 | 0.25  | 2.47  | 16.1 | 0.2735 | 4.42  |
| Tomales   | 6/4/08     | Weaner   | Male   | 2.32 | 1.28  | 0.2525 | 3.04  | 3.9   | 50.6 | 0.2525 | 5.41  |
| Tomales   | 6/5/08     | Weaner   | Female | 8.31 | 2.8   | 0.2525 | 4.07  | 8.31  | 134  | 0.2525 | 23    |
| Tomales   | 6/5/08     | Weaner   | Male   | 1.17 | 0.744 | 0.2535 | 4.26  | 1.8   | 32.6 | 0.2535 | 3.79  |
| Tomales   | 6/18/07    | Subadult | Female | 1.75 | 0.25  | 0.25   | 1.91  | 3.22  | 41.4 | 0.25   | 2.76  |
| Tomales   | 6/18/07    | Adult    | Female | 1.53 | 0.25  | 0.25   | 1.59  | 0.959 | 29   | 0.25   | 3.67  |
| Tomales   | 6/18/07    | Adult    | Male   | 1.99 | 0.25  | 0.25   | 2.29  | 2.36  | 59.5 | 0.25   | 3.56  |
| Tomales   | 6/18/07    | Adult    | Male   | 1.18 | 0.25  | 0.25   | 1.99  | 2.29  | 19.2 | 0.25   | 2.75  |
| Tomales   | 6/18/07    | Adult    | Female | 1.62 | 0.25  | 0.25   | 1.21  | 1.93  | 26.3 | 0.25   | 2.47  |
| Tomales   | 6/19/07    | Adult    | Female | 0.25 | 0.25  | 0.25   | 1.12  | 0.84  | 13.5 | 0.25   | 1.97  |

| SITE_NAME | SampleDate | Age      | Sex    | PFDA | PFDoA | PFHpA  | PFHxS | PFNA | PFOS | PFOA  | PFUnA |
|-----------|------------|----------|--------|------|-------|--------|-------|------|------|-------|-------|
| Castro    | 5/30/07    | Weaner   | Male   | 10.1 | 4.22  | 0.25   | 82.1  | 26.1 | 783  | 4.86  | 5.72  |
| Castro    | 6/4/07     | Subadult | Female | 2.01 | 0.54  | 0.25   | 1.87  | 2.91 | 16.5 | 0.25  | 5.88  |
| Castro    | 6/4/07     | Weaner   | Female | 2.06 | 0.847 | 0.25   | 29.7  | 3.86 | 184  | 1.25  | 2.75  |
| Castro    | 6/4/07     | Weaner   | Male   | 6.27 | 2.51  | 0.927  | 36.8  | 16.7 | 295  | 4.75  | 4.24  |
| Castro    | 5/5/08     | Weaner   | Female | 18.3 | 7.03  | 1.11   | 49.9  | 14.9 | 314  | 2.8   | 9.49  |
| Castro    | 5/5/08     | Weaner   | Female | 8.64 | 4.01  | 0.25   | 40.3  | 10.1 | 217  | 3.59  | 4.71  |
| Castro    | 5/5/08     | Weaner   | Male   | 4.36 | 2.74  | 0.2435 | 22.8  | 3.74 | 96.8 | 0.611 | 4.37  |
| Castro    | 5/5/08     | Weaner   | Male   | 7.3  | 3.1   | 1.91   | 61.7  | 10.7 | 324  | 3.83  | 3.73  |
| Castro    | 5/5/08     | Weaner   | Male   | 15.4 | 3.94  | 0.256  | 20.1  | 9.92 | 195  | 1.55  | 7.52  |
| Castro    | 5/5/08     | Weaner   | Male   | 10.1 | 2.82  | 0.38   | 42.9  | 12   | 270  | 2.89  | 5.01  |
| Castro    | 5/5/08     | Weaner   | Female | 8.19 | 3.39  | 0.329  | 16    | 7    | 160  | 1.01  | 4.78  |
| Castro    | 5/5/08     | Weaner   | Female | 3.38 | 1.77  | 0.2425 | 20.7  | 3.62 | 140  | 0.556 | 1.87  |

| SITE_NAME | SampleDate | Age      | Sex    | PFDA  | PFDoA | PFHpA  | PFHxS | PFNA | PFOS | PFOA  | PFUnA |
|-----------|------------|----------|--------|-------|-------|--------|-------|------|------|-------|-------|
| Castro    | 5/9/08     | Weaner   | Male   | 5.2   | 2.5   | 0.327  | 15.4  | 4.72 | 123  | 1.23  | 4.18  |
| Castro    | 5/9/08     | Weaner   | Female | 9.1   | 2.44  | 0.252  | 19.8  | 8.4  | 176  | 1.61  | 6.4   |
| Castro    | 5/12/08    | Weaner   | Female | 5.16  | 1.1   | 0.277  | 36.5  | 5.92 | 169  | 0.277 | 3.52  |
| Castro    | 5/12/08    | Weaner   | Male   | 18.1  | 6.57  | 0.837  | 93.2  | 29.7 | 697  | 4.86  | 7.78  |
| Castro    | 5/12/08    | Weaner   | Male   | 18.6  | 7.49  | 0.814  | 73.4  | 23.6 | 592  | 4.36  | 12.6  |
| Castro    | 5/19/08    | Weaner   | Female | 18.6  | 9.4   | 2      | 81.9  | 15   | 330  | 5.34  | 10.1  |
| Castro    | 5/19/08    | Weaner   | Male   | 11.8  | 8.02  | 0.2495 | 38.6  | 11.5 | 254  | 10.8  | 14    |
| Castro    | 5/19/08    | Weaner   | Female | 18.8  | 8.09  | 0.881  | 86.5  | 27.6 | 394  | 4.95  | 9.96  |
| Castro    | 5/30/07    | Weaner   | Female | 4.7   | 1.8   | 0.607  | 30.2  | 9.3  | 225  | 2.23  | 3.72  |
| Castro    | 5/30/07    | Weaner   | Male   | 5.07  | 2.11  | 1.86   | 28    | 14.7 | 194  | 6.15  | 3.67  |
| Castro    | 5/30/07    | Weaner   | Female | 3.42  | 1.99  | 0.25   | 83    | 16.3 | 361  | 2.14  | 2.98  |
| Castro    | 6/1/07     | Weaner   | Male   | 25    | 11.9  | 3.36   | 69    | 29.4 | 1280 | 11    | 17.5  |
| Castro    | 6/1/07     | Subadult | Female | 8.23  | 2.2   | 0.25   | 23.5  | 9.08 | 152  | 4.52  | 4.28  |
| Castro    | 6/1/07     | Subadult | Male   | 2.92  | 0.967 | 0.25   | 20.6  | 7.01 | 113  | 2.61  | 1.27  |
| Castro    | 6/4/07     | Adult    | Female | 1.84  | 0.572 | 0.25   | 4.57  | 2.24 | 44.7 | 0.903 | 1.11  |
| Castro    | 6/4/07     | Yearling | Male   | 1.17  | 0.25  | 0.25   | 6.46  | 2.05 | 40.2 | 0.25  | 2.32  |
| Castro    | 6/5/07     | Adult    | Female | 0.981 | 0.25  | 0.25   | 1.6   | 2.01 | 30.5 | 0.909 | 1.36  |
| Castro    | 6/6/07     | Adult    | Male   | 32.7  | 14.8  | 0.25   | 34.8  | 24.4 | 794  | 1.59  | 16.7  |
| Castro    | 6/6/07     | Yearling | Female | 0.53  | 0.25  | 0.25   | 7.53  | 1.38 | 20.3 | 0.25  | 1.39  |
| Castro    | 8/12/06    | yearling | male   | 4.35  | 1.21  | 0.25   | 35.5  | 12   | 219  | 0.81  | 3.6   |
| Castro    | 8/12/06    | adult    | female | 7.08  | 2.81  | 0.25   | 26.5  | 7.33 | 381  | 0.927 | 5.95  |
| Castro    | 8/12/06    | adult    | male   | 29.1  | 13.1  | 0.25   | 28.3  | 13.5 | 649  | 1.34  | 19.2  |

Green shading indicates compound was not detected above the detection limit. One half the detection limit is substituted for this value.

Table 3 Bird – Individual Results

| Code      | Name            | Date   | PFDA  | PFDoA | PFHxS | PFNA  | PFOS  | PFOA  | PFUnA |
|-----------|-----------------|--------|-------|-------|-------|-------|-------|-------|-------|
|           |                 |        | ug/kg |
| WI Comp 1 | Wheeler Island  | 5/1/06 | 9.5   | 8.54  | 2.44  | 8.59  | 135   | 1.22  | 8.96  |
| WI Comp 2 | Wheeler Island  | 5/1/06 | 10.3  | 6.44  | 2.55  | 6.19  | 101   | 2.7   | 8.27  |
| WI Comp 3 | Wheeler Island  | 5/1/06 | 5.25  | 3.29  | 3.065 | 6.33  | 74.5  | 1.535 | 4.22  |
| A Comp 1  | Don Edwards     | 5/1/06 | 23.4  | 4.4   | 13.4  | 16.4  | 1630  | 9.9   | 8.54  |
| A Comp 2  | Don Edwards     | 5/1/06 | 24.7  | 19.5  | 8.96  | 10.1  | 1050  | 5.14  | 9.35  |
| A Comp 3  | Don Edwards     | 5/1/06 | 17.9  | 14.6  | 8.77  | 13.6  | 1080  | 8.69  | 8.85  |
| RB Comp 1 | Richmond Bridge | 5/1/06 | 1.39  | 5.69  | 2.78  | 1.39  | 77.7  | 1.39  | 4.47  |
| RB Comp 2 | Richmond Bridge | 5/1/06 | 1.495 | 4.06  | 2.995 | 1.495 | 63    | 1.495 | 3.66  |
| RB Comp 3 | Richmond Bridge | 5/1/06 | 7.97  | 8.14  | 2.745 | 5.19  | 700   | 1.375 | 6.38  |

| Code        | Name                   | Date    | PFDA  | PFDoA | PFHxS | PFNA  | PFOS  | PFOA  | PFUnA |
|-------------|------------------------|---------|-------|-------|-------|-------|-------|-------|-------|
|             |                        |         | µg/Kg |
| 2RBRMPDCCO  | Richmond Bridge        | 5/1/09  | 3.73  | 3.67  | 2.415 | 3.81  | 94.7  | 5.92  | 3.61  |
| 2RBRMPDCCO  | Richmond Bridge        | 5/1/09  | 10.5  | 13.7  | 5.26  | 2.94  | 158   | 1.24  | 10.7  |
| 2RBRMPDCCO  | Richmond Bridge        | 5/1/09  | 12.5  | 11.3  | 5.63  | 4.68  | 116   | 1.23  | 7.21  |
| 2SBT37DCCO  | South Bay (Tower 37)   | 5/27/09 | 28.3  | 8.3   | 40.1  | 39.5  | 1760  | 28.7  | 9.42  |
| 2SBT38DCCO  | South Bay (Tower 38)   | 5/27/09 | 20.6  | 4.64  | 20.6  | 26.3  | 1140  | 22.8  | 6.74  |
| 2SBT430DCCO | South Bay (Tower 4/30) | 5/24/09 | 19.9  | 10    | 14.9  | 25.7  | 833   | 21.3  | 7.36  |
| 2WIRMPDCCO  | Wheeler Island         | 3/19/09 | 7.73  | 5.19  | 2.415 | 4.85  | 73.8  | 1.21  | 2.92  |
| 2WIRMPDCCO  | Wheeler Island         | 3/19/09 | 8.32  | 3.45  | 2.465 | 4.89  | 95.7  | 1.23  | 4.14  |
| 2WIRMPDCCO  | Wheeler Island         | 3/19/09 | 12.5  | 3.51  | 2.475 | 7.96  | 83.7  | 1.24  | 4.95  |

Yellow shading indicates compound was not detected above the detection limit. One half the detection limit is substituted for this value.



Table 4 Number of Seals by Age Class

| <b>Site</b>  | <b>Adult</b> | <b>Sub-adult</b> | <b>Yearling</b> | <b>Weaner</b> |
|--------------|--------------|------------------|-----------------|---------------|
| Mowry Slough | 4            | 0                | 0               | 2             |
| Castro Rocks | 5            | 3                | 3               | 23            |
| Tomales Bay  | 7            | 3                | 2               | 9             |
| Total        | 16           | 6                | 5               | 34            |

Table 5 Range of Method Detection Limits by Matrix

|                                              | Small Fish<br>(ng/g) | Seals<br>(ng/ml) | Cormorants<br>(ng/g) |
|----------------------------------------------|----------------------|------------------|----------------------|
| Ethyl-perfluorooctanesulfonamide, N-         | 1.8-14.7             | NA               | NA                   |
| Ethyl-perfluorooctanesulfonamidoethanol, N-  | 1.1-4.8              | NA               | NA                   |
| Methyl-perfluorooctanesulfonamide, N-        | 4.6-31.4             | NA               | NA                   |
| Methyl-perfluorooctanesulfonamidoethanol, N- | 1.0-4.9              | NA               | NA                   |
| Perfluorobutanesulfonate                     | 4.9-5.0              | 1.0-5.0          | 4.7-8.2              |
| Perfluorobutanoate                           | 2.4-2.5              | 0.5-0.8          | 2.4-4.1              |
| Perfluorodecanoate                           | 2.4-2.5              | 0.5-0.8          | 2.4-4.1              |
| Perfluorododecanoate                         | 2.4-2.5              | 0.5-0.8          | 2.4-4.1              |
| Perfluoroheptanoate                          | 2.4-2.5              | 0.5-0.8          | 2.4-4.1              |
| Perfluorohexanesulfonate                     | 4.9-5                | 1.0-7.4          | 4.7-8.2              |
| Perfluorohexanoate                           | 2.4-2.5              | 0.4-1.8          | 2.4-4.1              |
| Perfluorononanoate                           | 2.4-2.5              | 0.4-0.8          | 2.4-4.1              |
| Perfluorooctanesulfonamide                   | 2.4-2.5              | NA               | 2.4-4.1              |
| Perfluorooctanesulfonate                     | 4.9-5.0              | 1.0-24.5         | 4.7-8.2              |
| Perfluorooctanoate                           | 2.4-2.5              | 0.5-0.8          | 2.4-4.1              |
| Perfluoropentanoate                          | 2.4-2.5              | 0.5-0.8          | 2.4-4.1              |
| Perfluoroundecanoate                         | 2.4-2.5              | 0.5-0.8          | 2.4-4.1              |

NA - Not analyzed
